# Supplementary material for: Clock-dependent chromatin topology modulates circadian transcription and behavior
Source: PubMed Central journal article supplement (PMC5900709; doi:10.1101/gad.312397.118), 2018-03-01

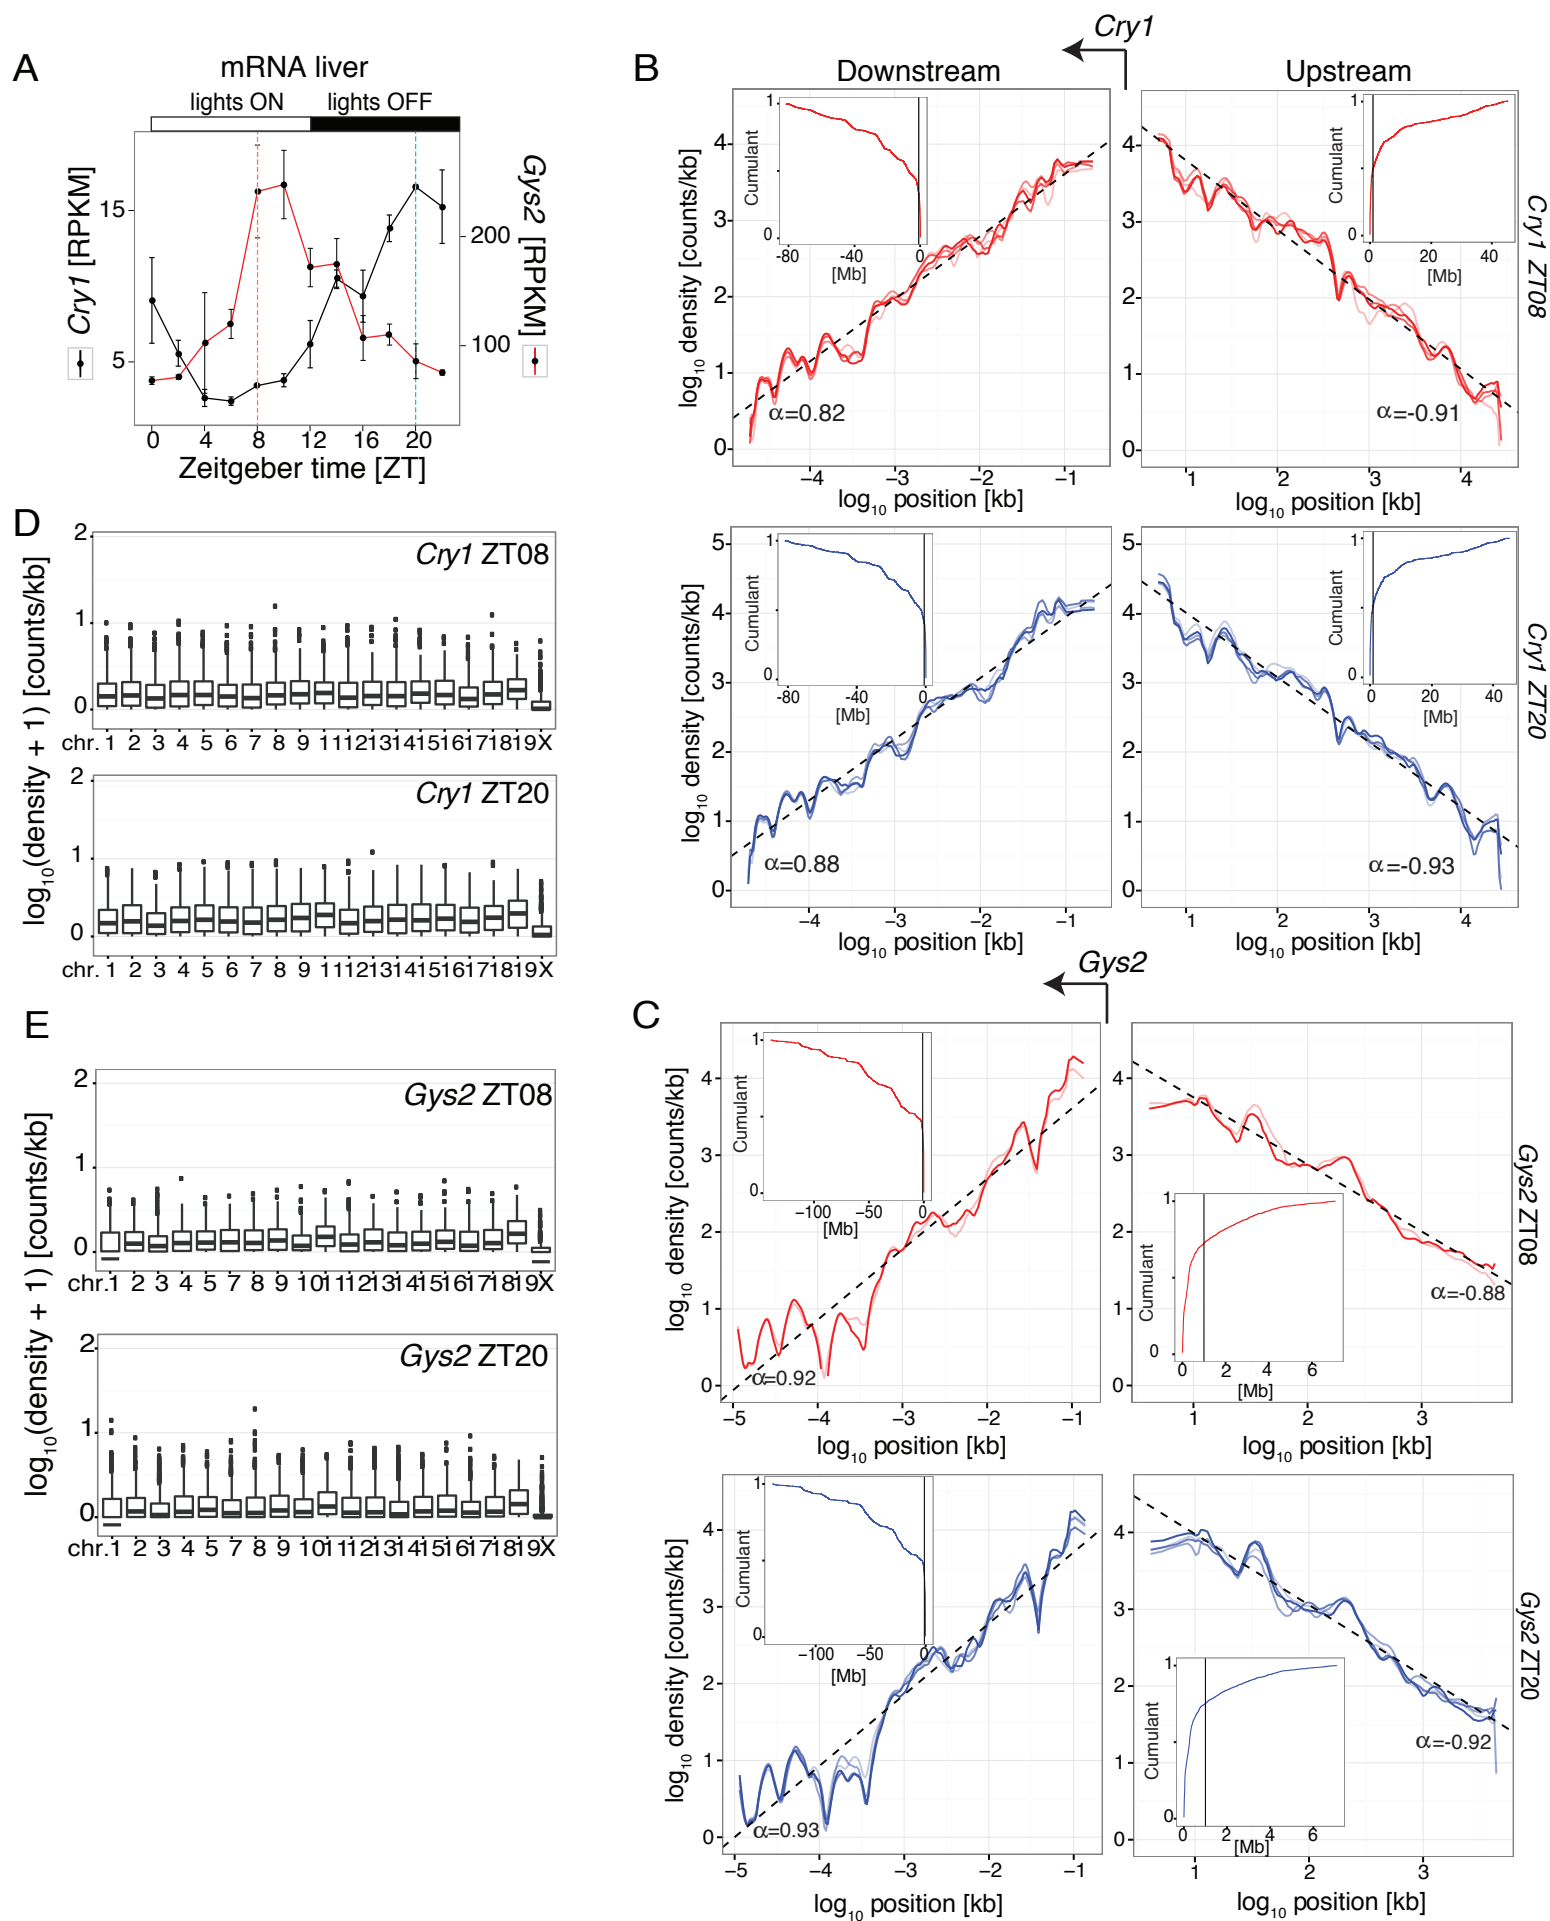

Supplement: supp_gad.312397.118_Supplemental_Fig_S1.pdf [file supp_gad.312397.118_Supplemental_Fig_S1.pdf]
