# Supplementary material for: Clock-dependent chromatin topology modulates circadian transcription and behavior
Source: PubMed Central journal article supplement (PMC5900709; doi:10.1101/gad.312397.118), 2018-03-01

**A**

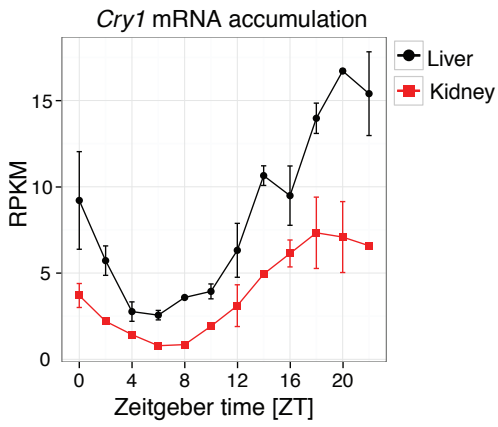

**D**

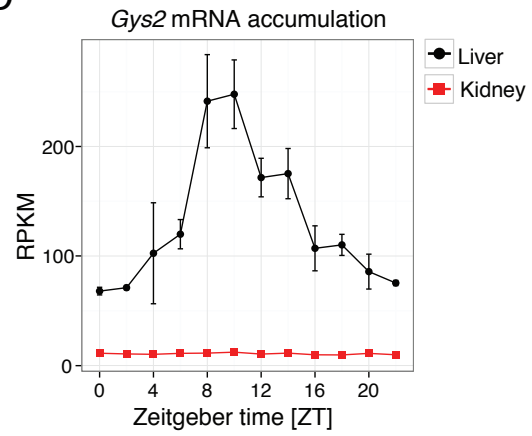

**B**

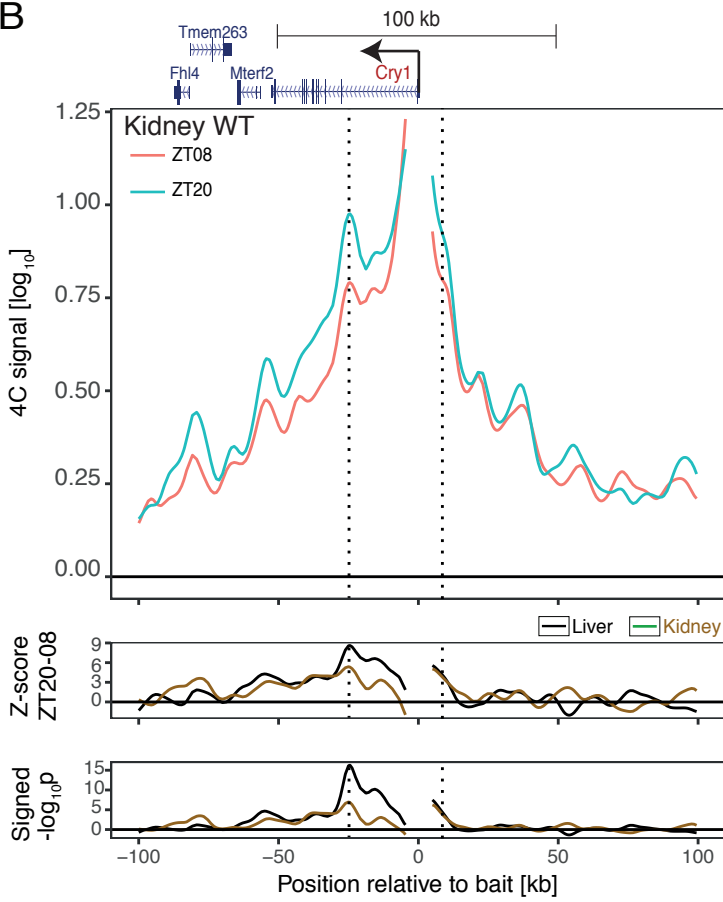

**E**

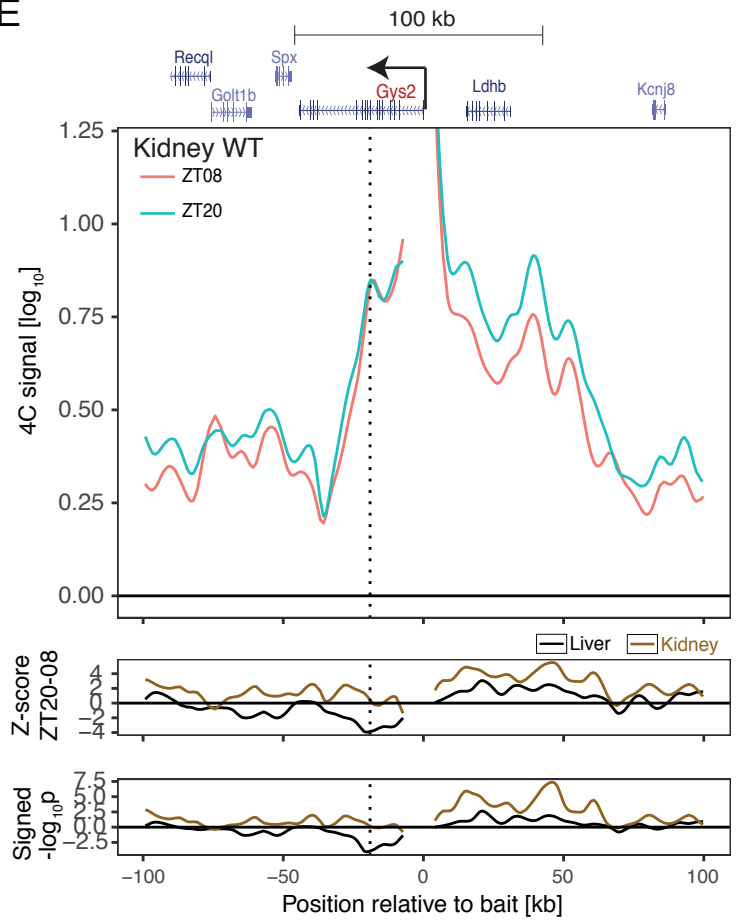

**C**

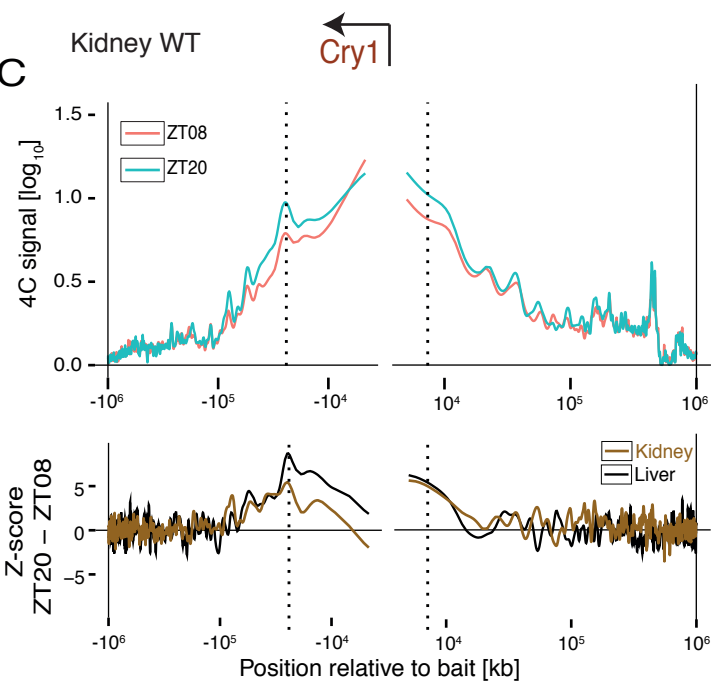

**F**

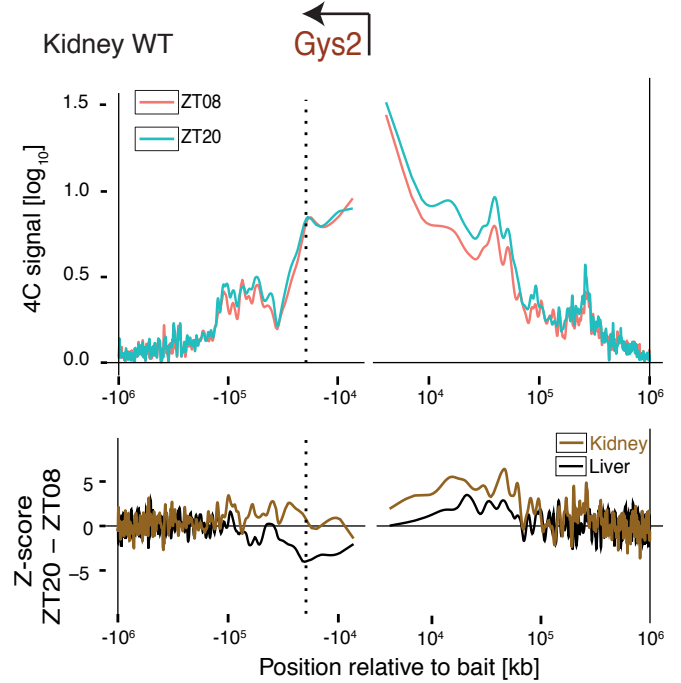

Supplement: supp_gad.312397.118_Supplemental_Fig_S3.pdf [file supp_gad.312397.118_Supplemental_Fig_S3.pdf]
